# Supplementary material
Source: PubMed Central journal article supplement (PMC7517595)
Supplement: NIHMS1629344-supplement-Combined_Supplemental_Tables.pdf [file NIHMS1629344-supplement-Combined_Supplemental_Tables.pdf]

## Supplementary Information Guide

**Supplementary Figure 1: Uncropped western blots.** Format: eighteen image display items.

**Table S1: Histone post translational modification mass spectrometry data in resting and stimulated BMDM.** See methods for details. Format: spreadsheet and graph.

**Table S2: List of top ranked H3.3S31ph peaks, BMDM, 60 min LPS.** Genes were ranked by H3.3S31ph ChIPseq tag density from transcription start site to transcription end site. Format: gene list in rank order.

**Table S3: SETD2:H3.3S31ph structure characteristics.** Data collection and refinement statistics. Format: text table.

**Table S4: Intersection of H3.3S31ph top 1% genes and H3.3S31ph peak-annotated genes.** Format: gene list in alphabetical order.

# Supplementary information Figure 1

## Uncropped scans of Western blots

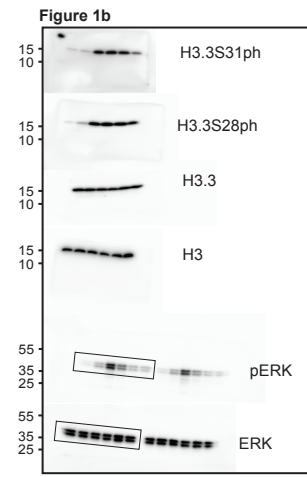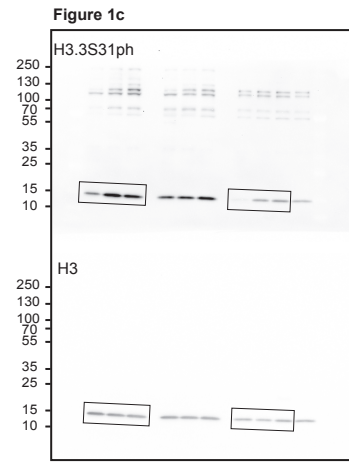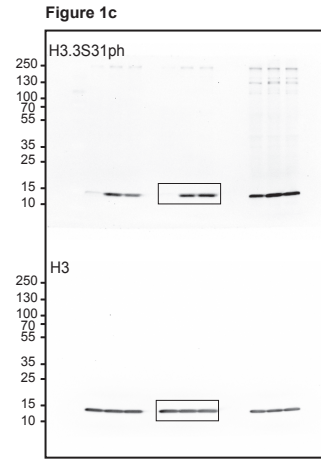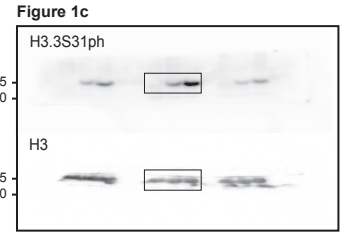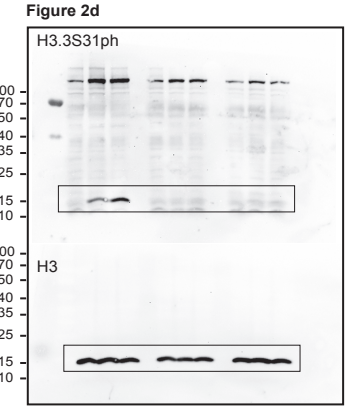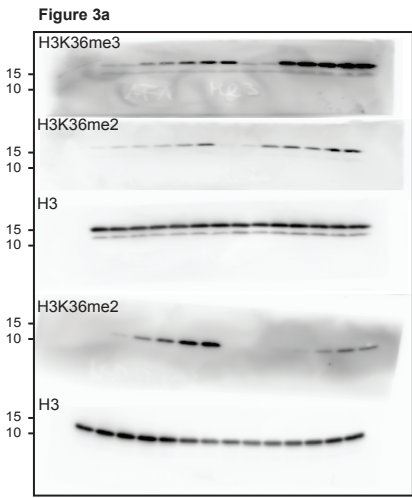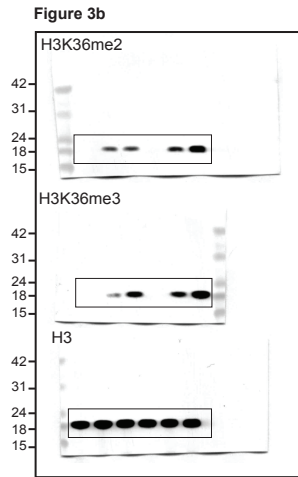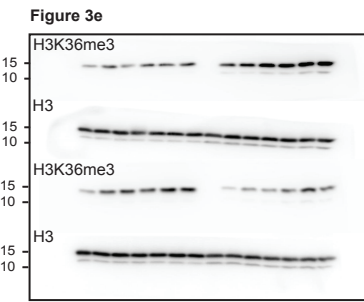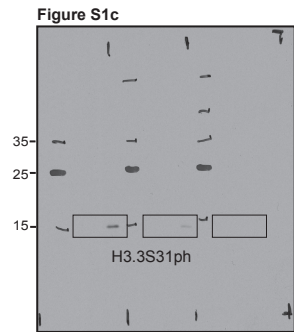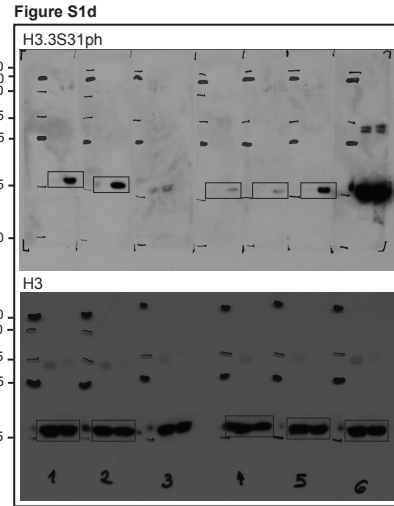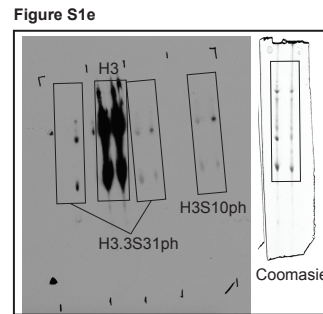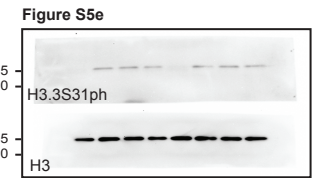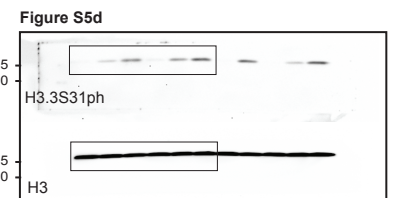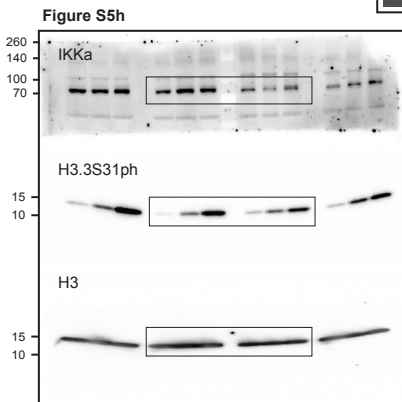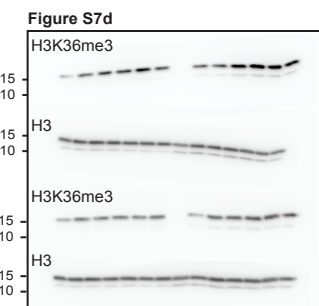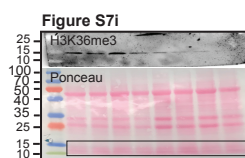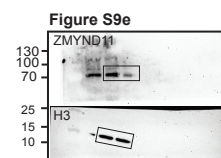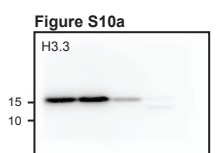

Supplemental Table 1

MS/MS quantitative analysis of H3 PTMs

| H3 9-17           | 0             | 30            | 60            | H3.1/2 27-40      | 0             | 30            | 60            | H3.3 27-40                           | 0             | 30            | 60            |
|-------------------|---------------|---------------|---------------|-------------------|---------------|---------------|---------------|--------------------------------------|---------------|---------------|---------------|
| Unmod             | 6.93%         | 5.35%         | 3.18%         | Unmod             | 1.12%         | 0.98%         | 0.76%         | Relative H3.3 amount (out of total I | 8.28%         | 7.44%         | 7.30%         |
| K9me1K14ac        | 3.46%         | 2.66%         | 1.85%         | K27me1            | 3.55%         | 2.85%         | 2.59%         | Unmod                                | 3.08%         | 2.92%         | 2.31%         |
| K9me1             | 4.42%         | 3.13%         | 1.67%         | K36me1            | 0.24%         | 0.28%         | 0.17%         | K27me1                               | 1.94%         | 2.34%         | 1.71%         |
| K9me2             | 35.14%        | 35.53%        | 35.59%        | K27me2            | 35.83%        | 39.27%        | 40.06%        | K36me1                               | 0.00%         | 0.08%         | 0.00%         |
| K9me3K14ac        | 6.41%         | 7.11%         | 8.53%         | K36me2            | 0.56%         | 0.41%         | 0.33%         | K27me2                               | 11.09%        | 12.33%        | 10.95%        |
| K9me3             | 30.31%        | 29.64%        | 30.37%        | K27me3            | 10.97%        | 12.34%        | 12.23%        | K36me2                               | 10.60%        | 9.90%         | 10.67%        |
| K9/K14ac          | 4.47%         | 4.23%         | 3.34%         | K27me2K36me1      | 16.37%        | 14.48%        | 11.34%        | K27me3                               | 6.09%         | 6.52%         | 6.64%         |
| K9me2 K14Ac       | 30.89%        | 31.29%        | 35.67%        | K27me1K36me2      | 2.00%         | 1.50%         | 1.06%         | K27me2K36me1                         | 14.06%        | 14.75%        | 13.43%        |
| K9Ac K14Ac        | 0.15%         | 0.16%         | 0.14%         | K27me1K36me1      | 1.14%         | 0.84%         | 0.70%         | K27me1K36me2                         | 13.70%        | 10.45%        | 9.75%         |
| <b>S10ph</b>      | <b>0.298%</b> | <b>0.460%</b> | <b>0.575%</b> | K27me3K36me1      | 7.81%         | 6.90%         | 5.37%         | K27me1K36me1                         | 1.29%         | 1.07%         | 0.39%         |
| Within the S10ph: |               |               |               | K27me1K36me3      | 3.10%         | 0.86%         | 0.65%         | K27me3K36me1                         | 8.06%         | 7.81%         | 5.66%         |
| S10ph             | 1.84%         | 3.14%         | 1.31%         | K27me2K36me2      | 10.38%        | 11.24%        | 14.18%        | K27me1K36me3                         | 8.88%         | 7.32%         | 6.33%         |
| K9me1S10phK14ac   | 0.00%         | 0.00%         | 0.00%         | K27me3K36me2      | 6.70%         | 7.57%         | 9.77%         | K27me2K36me2                         | 5.29%         | 4.77%         | 5.36%         |
| K9me1S10ph        | 0.00%         | 2.14%         | 1.10%         | K27me3K36me3      | 0.21%         | 0.34%         | 0.44%         | K27me3K36me2                         | 15.55%        | 18.99%        | 24.98%        |
| K9me2S10ph        | 28.09%        | 24.36%        | 23.88%        | <b>S28ph</b>      | <b>0.004%</b> | <b>0.144%</b> | <b>0.332%</b> | K27me3K36me3                         | 0.36%         | 0.34%         | 0.91%         |
| K9me3S10phK14ac   | 12.14%        | 10.59%        | 15.28%        | Within the S28ph  |               |               |               | <b>Sph</b>                           | <b>0.000%</b> | <b>0.389%</b> | <b>0.922%</b> |
| K9me3S10ph        | 42.19%        | 35.66%        | 34.87%        | K27me2S28ph       | 0.00%         | 5.11%         | 1.12%         | Within Sph                           |               |               |               |
| K9/K14ac S10ph    | 0.00%         | 2.77%         | 1.60%         | K27me3S28ph       | 0.00%         | 5.00%         | 3.42%         | K27me2S28ph                          | 0.00%         | 0.82%         | 2.15%         |
| K9me2S10phK14Ac   | 15.74%        | 17.56%        | 21.19%        | K27me3S28phK36me1 | 0.00%         | 1.26%         | 1.59%         | K27me2S28phK36me1                    | 0.00%         | 2.63%         | 0.00%         |
| K9AcS10phK14Ac    | 0.00%         | 3.78%         | 0.78%         | K27me1S28phK36me3 | 0.00%         | 0.11%         | 0.30%         | K27me1S28phK36me2                    | 0.00%         | 0.38%         | 0.00%         |
| K9ac/K14ac S10ph  | 0.00%         | 6.55%         | 2.38%         | K27me2S28phK36me2 | 0.00%         | 48.82%        | 38.80%        | K27me2S31phK36me2                    | 0.00%         | 55.16%        | 15.64%        |
|                   | 0.00%         | 0.03%         | 0.01%         | K27me3S28phK36me2 | 0.00%         | 39.69%        | 54.60%        | K27me3S28phK36me2                    | 0.00%         | 41.01%        | 82.21%        |

| Time                         | 0 min       | 30 min      | 60 min      |
|------------------------------|-------------|-------------|-------------|
| <b>S10ph</b>                 | <b>0.30</b> | <b>0.46</b> | <b>0.57</b> |
| <b>K9/K14ac S10ph</b>        | <b>0.00</b> | <b>0.03</b> | <b>0.01</b> |
| <b>S28ph on H3.1/2 (92%)</b> | <b>0.00</b> | <b>0.14</b> | <b>0.33</b> |
| <b>S28ph on H3.3 (8%)</b>    | <b>0.00</b> | <b>0.17</b> | <b>0.78</b> |
| <b>S31ph</b>                 | <b>0.00</b> | <b>0.21</b> | <b>0.14</b> |
| <b>Sph on H3.3</b>           | <b>0.00</b> | <b>0.39</b> | <b>0.92</b> |

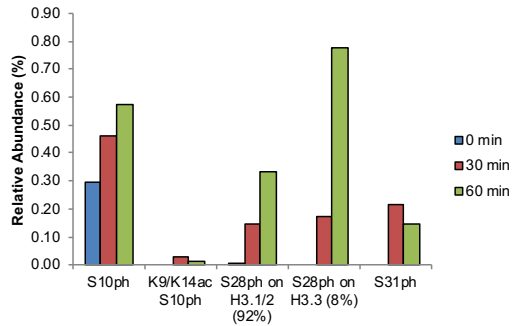

Supplemental Table 2  
Ordered top 100 H3.3S31ph peaks annotated to genes

Tnf  
Cxcl2  
Fbxo48  
Tnfaip2  
Nsd1  
Rgs1  
Tnfaip3  
Nfkbia  
Fth1  
Nfkbia  
Neat1  
Nsd1  
Mmp12  
Dusp1  
Zfp36  
Mir221  
Cnrip1  
Rheb  
Junb  
Tnfaip3  
Cd44  
Gm21188  
Mir222  
Klf6  
Cnrip1  
Cd44  
Mir21a  
Pim1  
Cd44  
Mcl1  
Nsd1  
Ubc  
Cd44  
Tnfaip2  
Slfn2  
Lsmem1  
Lgals3  
Malt1  
Cxcl1  
Cd44  
Mmp12  
Icam4  
4930444G20Rik  
Gadd45b  
Cnrip1  
H3f3b  
Lgals3

Lgals3  
Ehd1  
Malsu1  
Mthfs  
Mir222  
Prkg2  
Ftl1  
Ier2  
Gm20826  
Irf1  
Mir1938  
Malsu1  
Mir222  
Plk2  
Spp1  
Ccrl2  
Mthfsl  
Cflar  
Gm15723  
Socs3  
Mdga2  
Klf6  
Dusp1  
Brd2  
Vps13d  
Clec2d  
Ccl9  
Btg1  
Clec2d  
Vim  
Actb  
Egr2  
Egr2  
Irf1  
Gm21188  
Mir5131  
Nfkbiz  
H2-D1  
Tmem189  
Gm5294  
Clec2d  
Gucy1a2  
Mthfs  
Tmsb4x  
Gm21677  
Cd44  
Cd44  
Smurf2  
Mir5131  
Hnrnp11

Ccl9  
Il1a  
Ide

Supplemental Table 3,  
"Intersection of H3.3S31ph ""peak"" genes and Top 1% genes",

,gene\_names

1,Abca1  
2,Actb  
3,Alas1  
4,Anxa1  
5,Bbs10  
6,Bcl2a1b  
7,Bcl2l11  
8,Brd2  
9,Btg1  
10,Btg2  
11,Ccl3  
12,Ccl4  
13,Ccl9  
14,Ccnl1  
15,Ccrl2  
16,Cd14  
17,Cd200  
18,Cd274  
19,Cd44  
20,Cd68  
21,Cd83  
22,Cdkn1a  
23,Cflar  
24,Clec2d  
25,Clec4d  
26,Clic4  
27,Cpeb4  
28,Csrnp1  
29,Ctsb  
30,Ctsd  
31,Ctsl  
32,Cxcl1  
33,Cxcl2  
34,Cybb  
35,Dtx4  
36,Dusp1  
37,Dusp4  
38,Egr2  
39,Ehd1  
40,Eif4a1  
41,Erdr1  
42,Fabp4  
43,Fam129b  
44,Fam20c  
45,Fnip2  
46,Fth1  
47,Ftl1

48,G530011006Rik  
49,Gadd45b  
50,Glipr1  
51,Gna13  
52,Gpnmb  
53,Gpr137b  
54,H2-D1  
55,H2-K1  
56,H3f3b  
57,Hapln3  
58,Hnrnp11  
59,Icam1  
60,Icam4  
61,Id2  
62,Ier2  
63,Igf1  
64,Igsf6  
65,Il1a  
66,Il1b  
67,Il1bos  
68,Irf1  
69,Itga5  
70,Junb  
71,Klf6  
72,Lcp1  
73,Lgals3  
74,Lpl  
75,Lrp12  
76,Lyz2  
77,Malat1  
78,Malt1  
79,Mamdc2  
80,Mapkapk2  
81,Marcks  
82,Mcl1  
83,Mdm2  
84,Met  
85,Mir142b  
86,Mir1894  
87,Mir221  
88,Mir222  
89,Mir23a  
90,Mir3064  
91,Mir3109  
92,Mir5129  
93,Mir7683  
94,Mmp12  
95,Mpeg1  
96,Mtpn  
97,Neat1



98,Nfe2l2  
99,Nfkbia  
100,Nfkbid  
101,Nfkbiz  
102,Nlrp3  
103,Nrp2  
104,Olfr111  
105,Olrl  
106,Pik3r5  
107,Pim1  
108,Plau  
109,Plekho2  
110,Plk2  
111,Ppp1r15a  
112,Prdx1  
113,Psap  
114,Rab8b  
115,Rassf4  
116,Rhob  
117,Rnf149  
118,Rnf19b  
119,Rtn4  
120,Sdc4  
121,Sirpa  
122,Slamf7  
123,Slc2a6  
124,Slc35b2  
125,Slc7a2  
126,Slfn2  
127,Snord89  
128,Socs3  
129,Spp1  
130,Sqstm1  
131,Syk  
132,Tfec  
133,Tgif1  
134,Tmsb4x  
135,Tnf  
136,Tnfaip2  
137,Tnfaip3  
138,Tnfrsf1b  
139,Tnip1  
140,Tnip3  
141,Txn1  
142,Txnip  
143,Ubc  
144,Vim  
145,Zeb2os  
146,Zfp36

Supplementary Table 4: Data collection and refinement statistics

| SETD2-SAH-H3.3S31phK36M                  |                                               |
|------------------------------------------|-----------------------------------------------|
| <b>Data collection</b>                   |                                               |
| Space group                              | P2 <sub>1</sub> 2 <sub>1</sub> 2 <sub>1</sub> |
| Cell dimensions                          |                                               |
| a, b, c (Å)                              | 61.1, 77.0, 77.4                              |
| α, β, γ (°)                              | 90, 90, 90                                    |
| Resolution (Å)                           | 50-1.78 (1.81-1.78)*                          |
| R <sub>merge</sub>                       | 7.5 (36.5)                                    |
| I/σI                                     | 27(3.7)                                       |
| Completeness (%)                         | 99.8 (97)                                     |
| Redundancy                               | 6.5 (5.9)                                     |
| <b>Refinement</b>                        |                                               |
| Resolution (Å)                           | 34.58 - 1.78                                  |
| No. reflections                          | 35706                                         |
| R <sub>work</sub> /R <sub>free</sub> (%) | 17.8/19.7                                     |
| No. atoms                                |                                               |
| Protein                                  | 1983                                          |
| Peptide/SAH/Zn                           | 112/26/3                                      |
| Water                                    | 284                                           |
| Others                                   | 12                                            |
| B-factors (Å <sup>2</sup> )              |                                               |
| Protein                                  | 30.5                                          |
| Peptide/SAH/Zn                           | 30.2/20.9/25.1                                |
| Water                                    | 38.2                                          |
| Others                                   | 46                                            |
| R.m.s. deviations                        |                                               |
| Bond lengths (Å)                         | 0.007                                         |
| Bond angles (°)                          | 1.18                                          |

\* Values in parentheses are for highest-resolution shell.
